# Supplementary material for: A Web-Based Computer-Tailored Alcohol Prevention Program for Adolescents: Cost-Effectiveness and Intersectoral Costs and Benefits
Source: PubMed Central journal article supplement (PMC4858595; doi:10.2196/jmir.5223), 2016-04-21
Supplement: jmir_v18i4e93_app1.pdf [file jmir_v18i4e93_app1.pdf]

| <b>Cost category</b>                    | <b>Unit</b> | <b>Maximum amount</b> |
|-----------------------------------------|-------------|-----------------------|
| <i>Health care sector</i>               |             |                       |
| General practitioner                    | Contacts    | 60                    |
| Emergency care                          | Contacts    | 40                    |
| Hospital stays                          | Days        | 120                   |
| Ambulance rides                         | Rides       | 20                    |
| Mental health care                      | Contacts    | 60                    |
| <i>Educational sector</i>               |             |                       |
| School absenteeism                      | Days        | 120                   |
| Attendance officer                      | Contacts    | 40                    |
| <i>Labor &amp; social security</i>      |             |                       |
| Work absenteeism                        | Days        | 120                   |
| <i>Household &amp; leisure</i>          |             |                       |
| Failure to perform household activities | Days        | 120                   |
| Failure to perform other activities     | Days        | 120                   |
| Youth and family center                 | Contacts    | 40                    |
| Family care                             | Contacts    | 40                    |
| <i>Criminal justice system</i>          |             |                       |
| Police services                         | Contacts    | 40                    |
| Youth police services                   | Contacts    | 40                    |
| Court proceedings                       | Amount      | 40                    |
| Child protection services               | Contacts    | 40                    |
| Child health protection services        | Contacts    | 40                    |
| <i>Substance use</i>                    |             |                       |
| Cigarettes                              | Packs       | 360                   |
| Soft drugs                              | Joints etc. | 360                   |
| Hard drugs                              | Pills etc.  | 360                   |
