# Supplementary material for: A Web-Based Computer-Tailored Alcohol Prevention Program for Adolescents: Cost-Effectiveness and Intersectoral Costs and Benefits
Source: PubMed Central journal article supplement (PMC4858595; doi:10.2196/jmir.5223), 2016-04-21
Supplement: jmir_v18i4e93_app3.pdf [file jmir_v18i4e93_app3.pdf]

**Male subgroup**

**Female subgroup**

**Younger adolescents subgroup**

**Older adolescents subgroup**

**Lower educational level subgroup**

**Higher educational level subgroup**

**Religious subgroup**

**Non-religious subgroup**

**Dutch ethnicity subgroup**

**Other ethnicity subgroup**
